# Supplementary material for: Spatial Density and Distribution of Tumor-Associated Macrophages Predict Survival in Non–Small Cell Lung Carcinoma
Source: Oxford University Press journal article supplement (doi:10.1158/0008-5472.can-20-0069), 2020-07-22
Supplement: 00085472can200069-sup-235199_2_supp_6409103_qd4034.docx [file 00085472can200069-sup-235199_2_supp_6409103_qd4034.docx]

**Spatial Density and Distribution of Tumor-Associated Macrophages Predict Survival in Non-Small-Cell Lung Carcinoma**

**Authors:** Xiang Zheng1, Andreas Weigert2, Simone Reu3, Stefan Guenther1, Siavash Mansouri1, Birgit Bassaly4, Stefan Gattenlöhner4, Friedrich Grimminger5, Soni Savai Pullamsetti1,5, Werner Seeger1,5,6, Hauke Winter7, Rajkumar Savai1,5,6,8*

**Affiliations:**

1Max Planck Institute for Heart and Lung Research, Member of the German Center for Lung Research (DZL), Member of the Cardio-Pulmonary Institute (CPI), Bad Nauheim, 61231, Germany.

2Institute of Biochemistry I, Faculty of Medicine, Goethe University Frankfurt, Frankfurt, 60323, Germany.

3Institute of Pathology, University of Würzburg, Würzburg, 97070, Germany.

4Department of Pathology, Member of the DZL, Justus Liebig University, Giessen, 35390, Germany.

5Department of Internal Medicine, Member of the DZL, Member of CPI, Justus Liebig University, Giessen, 350390, Germany.

6Institute for Lung Health (ILH), Justus Liebig University, 35392, Giessen, Germany

7Translational Lung Research Center (TLRC) Heidelberg, German Center for Lung Research (DZL), Heidelberg, Germany; Department of Thoracic Surgery, Thoraxklinik at the University Hospital Heidelberg, Heidelberg, Germany.

8Frankfurt Cancer Institute (FCI), Goethe University, Frankfurt am Main, Germany.

***Corresponding author:** PD Dr. Rajkumar Savai, Molecular Mechanisms in Lung Cancer, Department of Lung Development and Remodelling, Max Planck Institute for Heart and Lung Research, Parkstrasse 1, D-61231 Bad Nauheim, Germany, Tel: +49 6032 705 420, Fax: +49 6032 705 471, e-mail: [rajkumar.savai@mpi-bn.mpg.de](mailto:rajkumar.savai@mpi-bn.mpg.de)

**Materials and Methods**

**Cell lines**

The human lung carcinoma cell line A549 (European Collection ECACC No 86012804) was purchased from Sigma-Aldrich in 2017. A549 were grown at 37°C in an atmosphere containing 5% CO2 in Dulbecco’s modified Eagle medium (DMEM), supplemented with 10% fetal calf serum and antibiotics (100 U/mL penicillin and 100 µg/mL streptomycin). The cell line was authenticated by the manufacturer and checked for mycoplasma, using LookOut® Mycoplasma PCR Detection Kit. The cells were verified to be mycoplasma negative and were used between passages two and ten. The cells were plated for experiments two passages after thawing and were plated at densities that allowed the cells to reach 80% confluence at experimental endpoints.

**Immunocytochemistry**

Peripheral blood monocytes were isolated from human buffy coats, using Ficoll (GE Healthcare) and density-gradient centrifugation, and cultured in 12-well plates containing poly-d-lysine-coated coverslips (18 mm in diameter, neuVitro). The macrophages were activated towards an M1 phenotype using 100 ng/mL lipopolysaccharide (Sigma-Aldrich) and 100 U/mL recombinant human interferon-γ (R&D Systems), or to an M2 phenotype using 20 ng/mL recombinant human interleukin (IL)4 (R&D Systems) for 24 hours and characterized by q RT-PCR and FACS analysis. A549 cells (5,000 cells/well), were seeded at a density of in 8-well chamber slides (BD Biosciences). The cells were fixed with 4% formaldehyde and permeabilized in PBS containing 0.2% Triton X-100 for 10 minutes at room temperature, and blocked with 1% bovine serum albumin in PBS for 1 hour at room temperature, and then incubated with the primary antibodies at 4°C overnight (Table S1). Fluorescently conjugated secondary antibodies were used at 1:1000 dilution to stain the cells for 1 hour at room temperature in darkness. The nuclei were counterstained with 4', 6-diamidino-2-phenylindole (DAPI, Life Technologies) at 1:100 for 10 minutes at room temperature. After one final rinse with PBS, the slides were mounted with Dako fluorescent mounting medium and examined under LSM 710 confocal microscope.

| **Table S1. Antibodies used for immunocytochemistry and immunohistochemistry staining** | | | | | | | |
| --- | --- | --- | --- | --- | --- | --- | --- |
| No | Antigen | Primary antibody | | | |  | TSA fluorophore |
| Provider | Catalog number | Source | Working dilution |  |  |
|  |  |  |  |  |  |  |  |
| 1 | Cytokeratin | DAKO | Z0622 | Rabbit | 1:500 |  | Opal 520 |
| 2 | ALOX15 | Santa Cruz | sc-32940 | Rabbit | 1:200 |  | Opal 540 |
| 3 | CD163 | Abcam | ab182422 | Rabbit | 1:250 |  | Opal 570 |
| 4 | IL12 | Abcam | ab9992 | Goat | 1 μg/mL |  | Opal 690 |
| 5 | CCR7 | R&D | MAB197 | Mouse | 1:100 |  | Opal 650 |
| 6 | CD68 | Abcam | Ab955 | Mouse | 1:300 |  | Opal 620 |
| 7 | DAPI | PerkinElmer | FP1490 | – | – |  | Spectral DAPI |
| 8 | CA9 | Novusbio | NB100-417 | Rabbit | 1:1000 |  | – |
| 9 | HIF-1α | Abcam | ab2185 | Rabbit | 1:500 |  | – |
| 10 | Ki67 | Abcam | ab16667 | Rabbit | 1:100 |  | – |
| 11 | Cleaved Caspase-3 | Cell signaling | 9664 | Rabbit | 1:1000 |  | – |
| 12 | MFSD12 | Sigma-Aldrich | HPA04214 | Rabbit | 1:150 |  | – |
| 13 | ACTR6 | Sigma-Aldrich | HPA038588 | Rabbit | 1:100 |  | – |
| 14 | UBXN4 | Sigma-Aldrich | HPA036325 | Rabbit | 1:100 |  | – |
| For staining requires fluorescently conjugated secondary antibodies, the anti-rabbit secondary antibody was purchased from ThermoFisher (A-31572), the anti-mouse secondary antibody was from ThermoFisher (A-31570), and the anti-goat secondary antibodies were provided by ThermoFisher (A-21432). The working dilution was 1:1000 for all secondary antibodies. TSA: tyramide signal amplification. | | | | | | | |
|  | | | | | | | |

| **Table S2. List of primers used for quantitative real time PCR (homo sapiens)** | | |
| --- | --- | --- |
| Gene | Primer sequences (5’-3’) | |
| *ALOX15* | FP | CTTCAAGCTTATAATTCCCCAC |
|  | RP | GATTCCTTCCACATACCGATAG |
| *IL12B* | FP | GCCCAGAGCAAGATGTGTCA |
|  | RP | CACCATTTCTCCAGGGGCAT |
| *CCL18* | FP | AAGCCAGGTGTCATCCTCCT |
|  | RP | CAGCTTCAGGTCGCTGATGT |
| *IL10* | FP | CAAGCTGAGAACCAAGACCC |
|  | RP | ACAGGGAAGAAATCGATGACAG |
| *CXCL10* | FP | GCACCATGAATCAAACTGCC |
|  | RP | GGTACTCCTTGAATGCCACT |
| *CSF1R* | FP | GAGAGCTATGAGGGCAACAG |
|  | RP | TCCGAGGGTCTTACCAAACT |
| *IL1B* | FP | AGAAACTGGCAGATACCAAACC |
|  | RP | TGGAAGGAGCACTTCATCTGT |
| *TNF* | FP | GAGGCCAAGCCCTGGTATG |
|  | RP | CGGGCCGATTGATCTCAGC |
| *CD163* | FP | AGCATGGAAGCGGTCTCTGTGATT |
|  | RP | AGCTGACTCATTCCCACGACAAGA |
| *CXCL8* | FP | ACAGCAGAGCACACAAGCTTC |
|  | RP | ATCAGGAAGGCTGCCAAGAG |
| *CCR7* | FP | GCTGGTGGTGGCTCTCCTT |
|  | RP | GTAATCGTCCGTGACCTCATCTT |
| *PTGS2* | FP | CTGGCGCTCAGCCATACAG |
|  | RP | CGCACTTATACTGGTCAAATCCC |
| *IQGAP2* | FP | AGCAGACAGCAACTTTAGCA |
|  | RP | CCCTACAGCTACAACTCCTTT |
| *HIVEP1* | FP | TGAGCGAGAGTCTGCCTTAG |
|  | RP | GTGCTTCTTCAATTTTGTCAGC |
| *ZMAT1* | FP | TGACCTTACTCTACAAACACGA |
|  | RP | GTTCTCATACTAAATGCTGTGGG |
| *LRRFIP2* | FP | ACCATCACTAAGGGCTGAAAA |
|  | RP | TCGGTCTTTCACAGGTGTTC |
| *ZNF37A* | FP | GAACAGACAGAGTCGCTTGA |
|  | RP | ACTGTGAGGGTGTAGTCTGT |
| *PUS7L* | FP | TAGTGCAGGGTGATTTGGTC |
|  | RP | AGTACTGGAAGAACCACCTGA |
| *PIH1D1* | FP | CTGCAGGCCTCGAAGGAG |
|  | RP | TATGCAGAAACCAGGCTGAGG |
| *TMEM189* | FP | TTGCTGACTTCTTGTCTGGC |
|  | RP | TGAAAGCCTTCCCCACAATGG |
| *PLOD1* | FP | CCGGAGGACAACCTTTTAGT |
|  | RP | CACATTCCAGTCCTCCCCTA |
| *BCL2L1* | FP | CTGGTGCTTTCGATTTGACTTA |
|  | RP | TAAGATTCAGAACTGGTTTCTTTGT |
| *METAP2* | FP | ATGATGAAGCAAAAGTTCAAACAG |
|  | RP | TCGCATTCTTGTCCTTTGGG |
| *DCAF7* | FP | CACCTTTGACCACCCATACC |
|  | RP | GTCTCTGTTTCACCAACCCTC |
| *HAMP* | FP | TTTCCCACAACAGACGGG |
|  | RP | GCAGGTAGGTTCTACGTCTTG |
| *PMP22* | FP | TTGGAAGAAGGGGTTACGCT |
|  | RP | CACGATCCATTGGCTGACG |
| *TRUB2* | FP | AAGGATTACACAGTGCGTGG |
|  | RP | GGTCACGTGGTCATAGGTTG |
| *MED16* | FP | CCGAAATCTCATCGCCTTCA |
|  | RP | CGGGAGCCTGACTGGT |
| *PAQR4* | FP | TCAGGCGTCCGGGCT |
|  | RP | TGGTGGCACATAAAGAGGTGA |
| *MFSD12* | FP | CGCTACGGCACCGTCT |
|  | RP | AGCCAAACTGGAAGATCACG |
| *CDKN2C* | FP | CGACTAATTCATCTTTTCCTGATCG |
|  | RP | GATTTCCAAGTTTCATAACCTGC |
| *SDF4* | FP | CTCAAAGTGGATGAGGAAAGACAT |
|  | RP | AGTCCCAAAGGTAGACGGAG |
| *UBTD1* | FP | AAGCGAGCAGGACGCAA |
|  | RP | CAGAACTCATCCCGTTTGCT |
| *AP1S3* | FP | GCCCAGCCACGATGATAC |
|  | RP | AAACTGCTTGTCCTGTGACC |
| *HABP4* | FP | GAGTCTCCAGCCAAAGTTCC |
|  | RP | ACAGTGGATTCTGGTTTCCG |
| *SPATA2* | FP | ACACTTTCGAGTAGAGCTGTC |
|  | RP | AGCGGAGTGCTCCTAAGTC |
| *TM2D3* | FP | AATAAAGGATCCGGGCCCAA |
|  | RP | TTTCAGTACTTTCTGCTGCCC |
| *IST1* | FP | TGAACCCTGAAGTCGGTGTC |
|  | RP | ATCAGCAACCTAACCGAATCCT |
| *UBXN4* | FP | AGCCTGCCTACAGTTTTCAC |
|  | RP | AATGCATCTGTCGGACCTTG |
| *UBR2* | FP | TAGATCGAGATGGGCGTAGG |
|  | RP | GTGCGACAATAGACGAATGC |
| *ACTR6* | FP | GCCATGAAAATGTGTCGGTT |
|  | RP | GCTGTTTTTGACCGGAACTG |
| *ZNF222* | FP | TTTCCACATCTTGCGAGTCC |
|  | RP | TTTAGAAAGGTCGGGCTCTG |
| *WARS* | FP | AGCTCATTGTTCGGTTTGGA |
|  | RP | CGGCCCGTGTACAGATAAAA |
| *KMT2C* | FP | GATACGGCCGAAATCCTCTC |
|  | RP | GTGAGGCCTTAACACAAACC |
| *ERAP2* | FP | TTCATCAGGGGTCAAGGTGT |
|  | RP | TTGATTCCGTTTGTCTGGGG |
| *TPCN1* | FP | GAGCTCTTTCCCATGGTGTG |
|  | RP | ATAGCTGCCGCCATAAAGC |
| *ADIPOR1* | FP | ATGTAGCGCGGGGGAC |
|  | RP | CCCTCTGATGGTAGACAAGCC |
| *SEC61A1* | FP | GTCATCTATTTCCAGGGCTTC |
|  | RP | AGCTTGATGGGATAGGTGTTG |
| *BNIP3L* | FP | GATGTGCAGTTGTTTCTGCTC |
|  | RP | CAGGAACCTTGTGAACTTGTCTTT |
| *FAM199X* | FP | ACCAACAGGTGGAACCTAAC |
|  | RP | CTTCTGAGCTGGCAACACTT |
| *PACS2* | FP | CGGAGCCAGCTACAGATCC |
|  | RP | GATGTGGTTGAGCTGGTCAT |
| *CPD* | FP | GGGCAGAATGGCTAATGGTC |
|  | RP | TTTCCAGAAAGCACAAACCTCA |
| *ZNF581* | FP | CTGCTGCACTGGGCCT |
|  | RP | AACGGAGGAAAATGCCAGAG |
| *PAG1* | FP | AGCCTTAGAAGACGTTCATGTT |
|  | RP | CCAGGGTGCCTCCTACAAT |
| *ANAPC4* | FP | CCCGAGCTGAATAAGGTAATGA |
|  | RP | GTGTTAGGGGGTGACACAAG |
| *SMTNL1* | FP | TTCTCCACAGCAGAGAAACTG |
|  | RP | ATGTGTAGACGCACTTGGAG |
| *SERPINB9* | FP | ATAAACCAGGAGGAGCAAAGG |
|  | RP | AACGTGGCCTCCTGATACAT |
| *ZC3H13* | FP | AGTCTGGAAGCAGGAGATGA |
|  | RP | TGCATCACCTGCCAGAATTT |
| *STK38L* | FP | TGCCTAGGGGCAGAAGAAAT |
|  | RP | CGCACCTCTTCATCTGCTAA |
| *DBF4* | FP | AAAGGACATTTCCAGGGTGG |
|  | RP | TTCTTCAACTCGATTTGGATTTTTC |
| *HLA-DRA* | FP | CTGGCGGCTTGAAGAATTTG |
|  | RP | GGAGGTACATTGGTGATCGG |
| *FCGR3A* | FP | AAGGAAATTGGTGGGTGACA |
|  | RP | ATGCCAGCTGAAACTAGAAGT |
| *LMNA* | FP | CAGCATCATACAAGAGATGGGA |
|  | RP | CTAGGGAAGGCAGCTCAAAC |
| *FCN1* | FP | CTGCTAGACCGGGGGTATT |
|  | RP | TCCGCTGGAAAACGGTCC |
| *LST1* | FP | TCGCCTAAAAGAGCAAGGAC |
|  | RP | AGCCTCTTTACATCATTCCGC |
| *GPX1* | FP | GGGGCAAGGTACTACTTATCG |
|  | RP | TTCTTGGCGTTCTCCTGATG |
| *CTSD* | FP | AGGGCGAGTACATGATCCC |
|  | RP | ACCTTGAGCGTGTAGTCCTC |
| *IER3* | FP | ATCTTCACCTTCGACCCTCT |
|  | RP | GGCGCCGGACCACTC |
| *TNFRSF1A* | FP | CTGCCACTGGAACCTACTTG |
|  | RP | CCTGACCCATTTCCTTTCGG |
| *VIM* | FP | ACAAATCCAAGTTTGCTGACC |
|  | RP | TACTCAGTGGACTCCTGCTT |
| *LILRB2* | FP | GACATCGAGTCCAGCCCAG |
|  | RP | CTTCAGGCTGTGTGTCCTTC |
| *SPP1* | FP | TGCAGTGATTTGCTTTTGCC |
|  | RP | AGGTACATCTTTAGTGCTGCTT |
| *HPRT* | FP | TGACACTGGCAAAACAATGCA |
|  | RP | GGTCCTTTTCACCAGCAAGCT |

| **Table S3. Correlation of TAM-related variables with clinicopathological features** | | | | | |
| --- | --- | --- | --- | --- | --- |
|  |  | *P* values | | | |
| Clinicopathological feature | | Tumor size | Metastasis | Tumor stage | Recurrence |
| Density | M1 TC-TAMs | 0.430 | 0.686 | 0.831 | 0.486 |
| M2 TC-TAMs | 0.717 | 0.716 | 0.574 | 0.781 |
| M1 IM-TAMs | 0.289 | 0.850 | 0.597 | 0.408 |
| M2 IM-TAMs | 0.615 | 0.462 | 0.827 | 0.565 |
|  |  |  |  |  |  |
| Proximity | M1 TC-TAMs | 0.653 | 0.830 | 0.293 | 0.499 |
| M2 TC-TAMs | 0.313 | **0.004** | 0.289 | 0.646 |
| M1 IM-TAMs | 0.699 | 0.615 | 0.380 | 0.968 |
| M2 IM-TAMs | **0.007** | **0.024** | 0.403 | 0.066 |
| Statistical test |  | Spearman’s rank correlation | Mann-Whitney U test | | |
| Differences in TAM spatial density and proximity with respect to tumor size, metastatic status, tumor stage, and recurrence. TAMs, tumor-associated macrophages; TC, tumor center; IM, invasive margin. | | | | | |

**
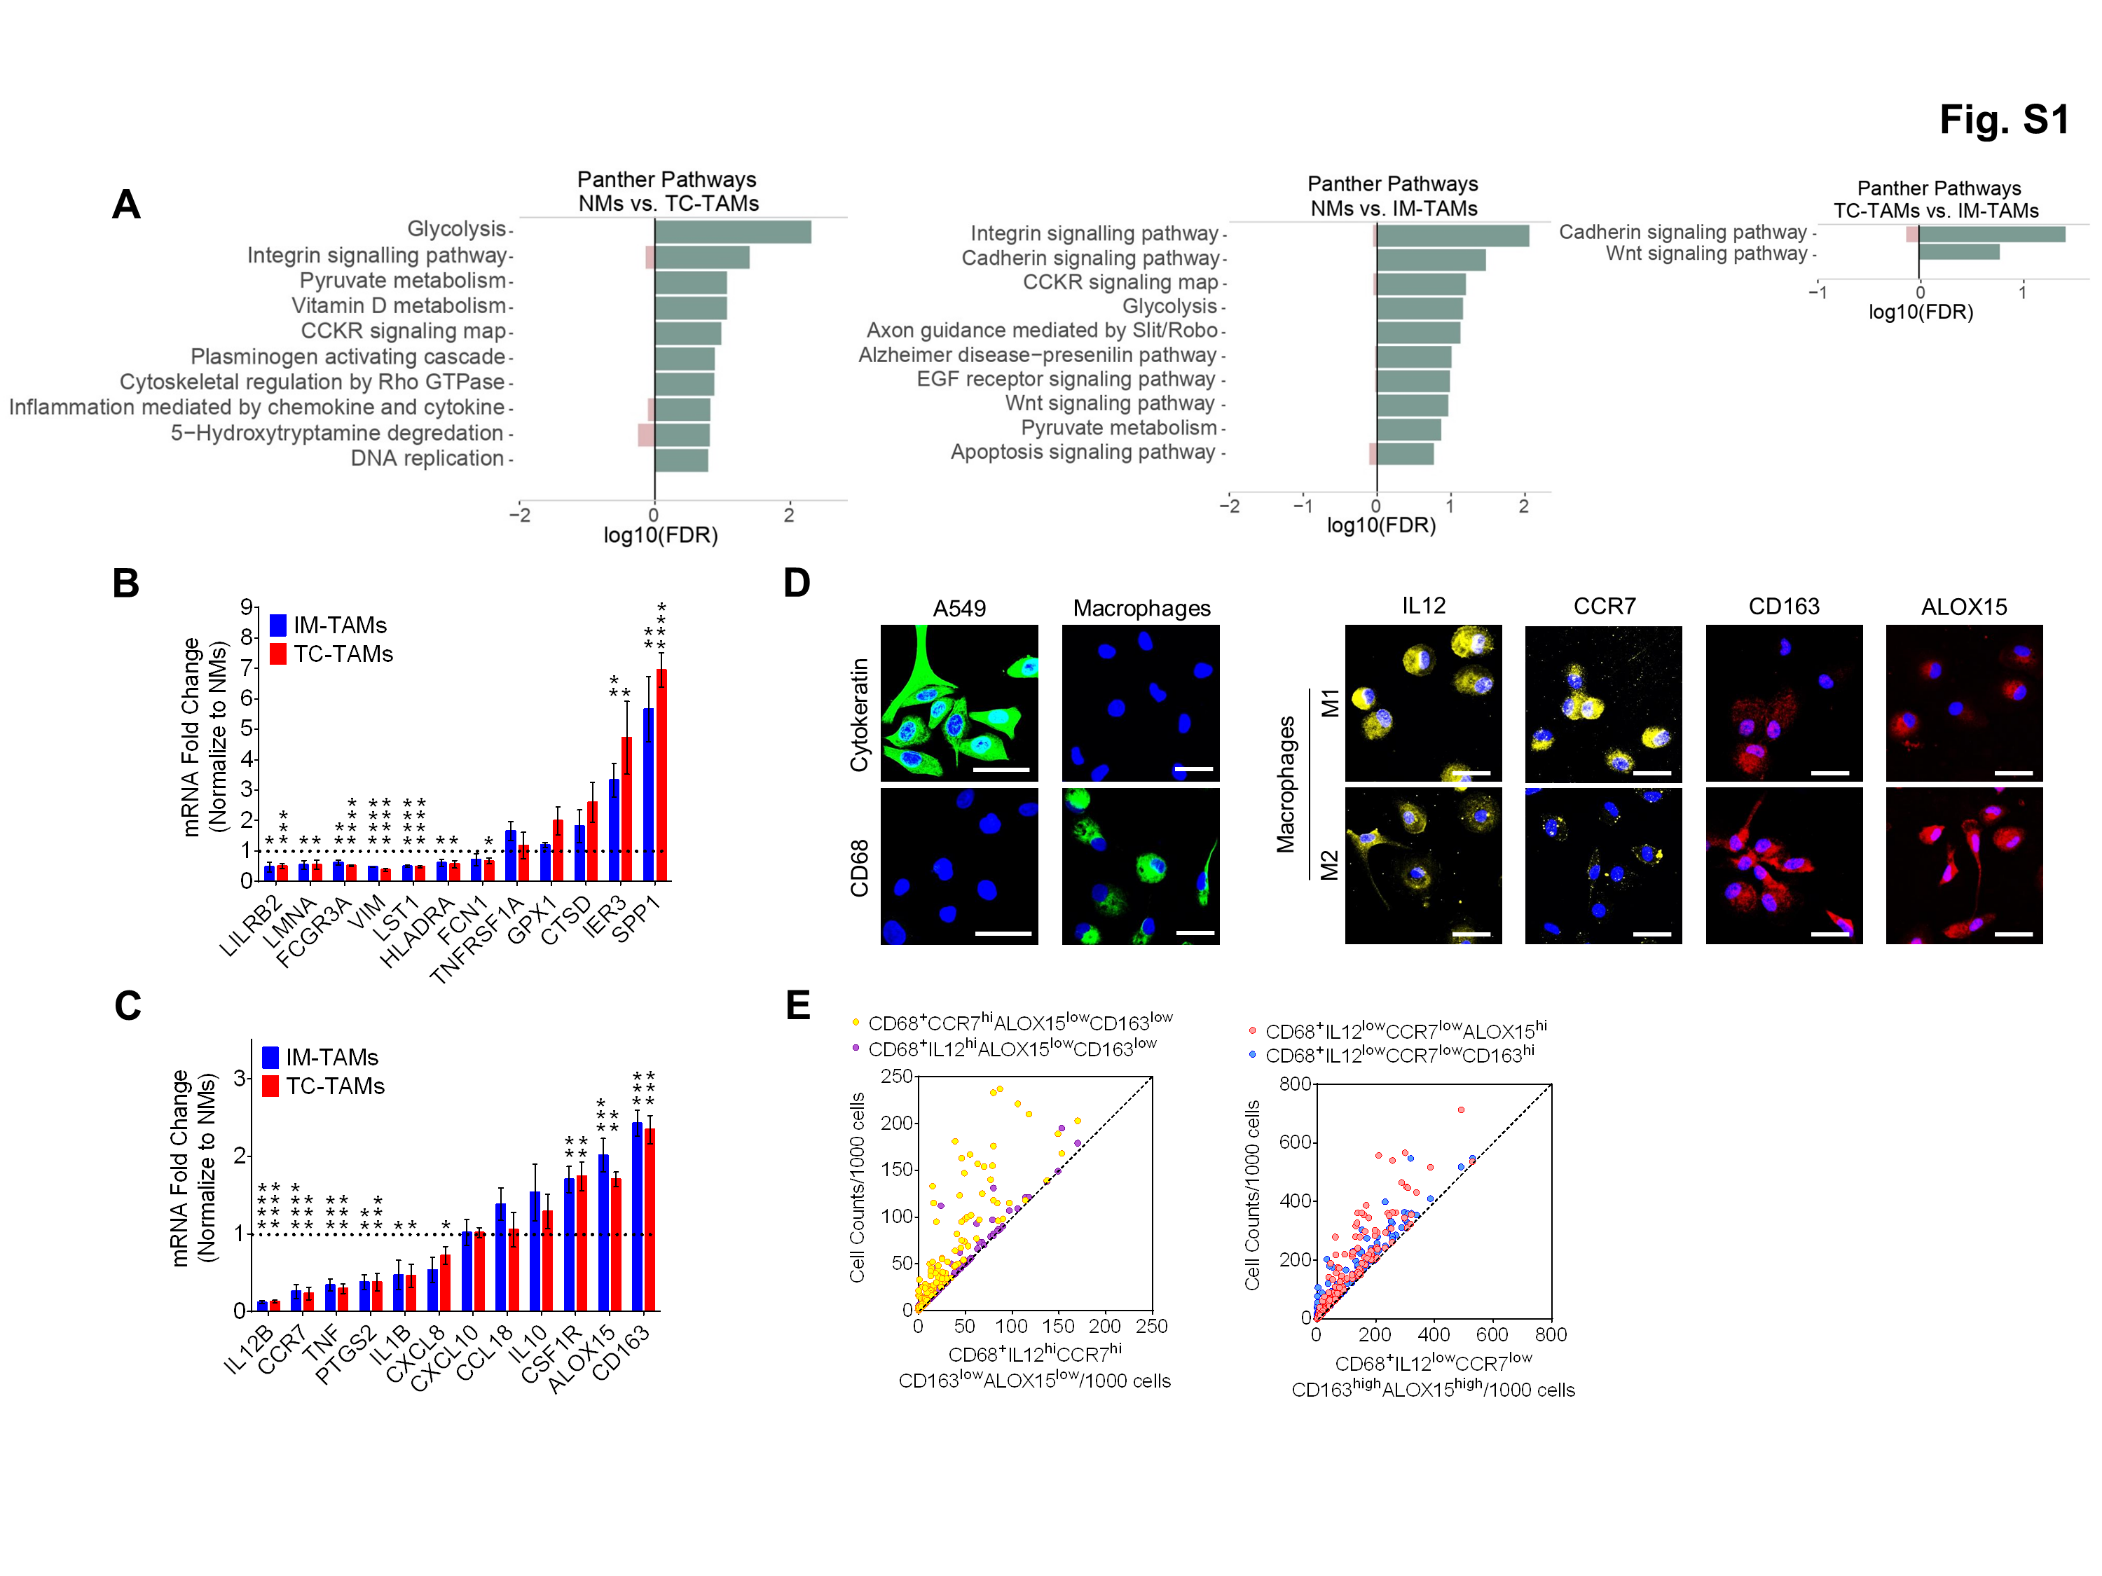
**

**Fig. S1. Pathway analysis and transcriptional signatures of macrophages from different lung cancer regions, and the marker selection for Opal seven-color multiplex staining.** (A)Gene set enrichment analysis, demonstrating the significant enrichment of gene set signatures in the PANTHER database for the indicated comparisons. The *x*-axes indicate the significance (log10 false discovery rate, FDR) of enrichment for the indicated comparisons.(B)mRNA expression levels of differentially regulated transcripts, which were reported by Lavin et al., using the single-cell transcriptomic analysis of lung adenocarcinoma-derived TAMs (10), in lung squamous cell carcinoma. mRNA expression was detected using qRT-PCR, and changes were determined relative to the respective expression levels in NMs from the same patients. Significance was determined by one-way ANOVA, and data are presented as the mean  SEM. * *P* < 0.05, ** *P* < 0.01; *** *P* < 0.001; **** *P* < 0.0001, n = 4.(C) mRNA expression of M1 (*IL12B*, *CCR7*, *TNF*, *PTGS2*, *IL1B*, *CXCL8* and *CXCL10*) and M2 (*CCL18*, *IL10*, *CSF1R*, *ALOX15* and *CD163*) markers was detected using qRT-PCR, and changes were determined relative to the respective expression levels in NMs from the same patients. Significance was determined by one-way ANOVA, and data are presented as the mean  SEM. * *P* < 0.05, ** *P* < 0.01; *** *P* < 0.001; **** *P* < 0.0001, n = 4. (D) Fluorescence microscopy of Cytokeratin (green) and CD68 (green) in A549 lung cancer cells and peripheral blood monocyte-derived macrophages. The expression of macrophage markers IL12 (yellow), CCR7 (yellow), CD163 (red), and ALOX15 (red) in M1/M2 macrophages were determined by fluorescence immunocytochemistry. Cell nuclei were stained with DAPI (blue). Scale bar, 20 µm. (E) Comparison between four marker-defined and five marker-defined TAMs. Five-marker-defined TAMs include CD68+IL12hiCCR7hiCD163lowALOX15low M1 TAMs and CD68+IL12lowCCR7lowCD163hiALOX15hi M2 TAMs. Each data point is located on the y-axis for the indicated four markers and the x-axis for the indicated five markers (*P* < 0.001). Significance (*P* < 0.05) was determined by the Wilcoxon signed-rank test.


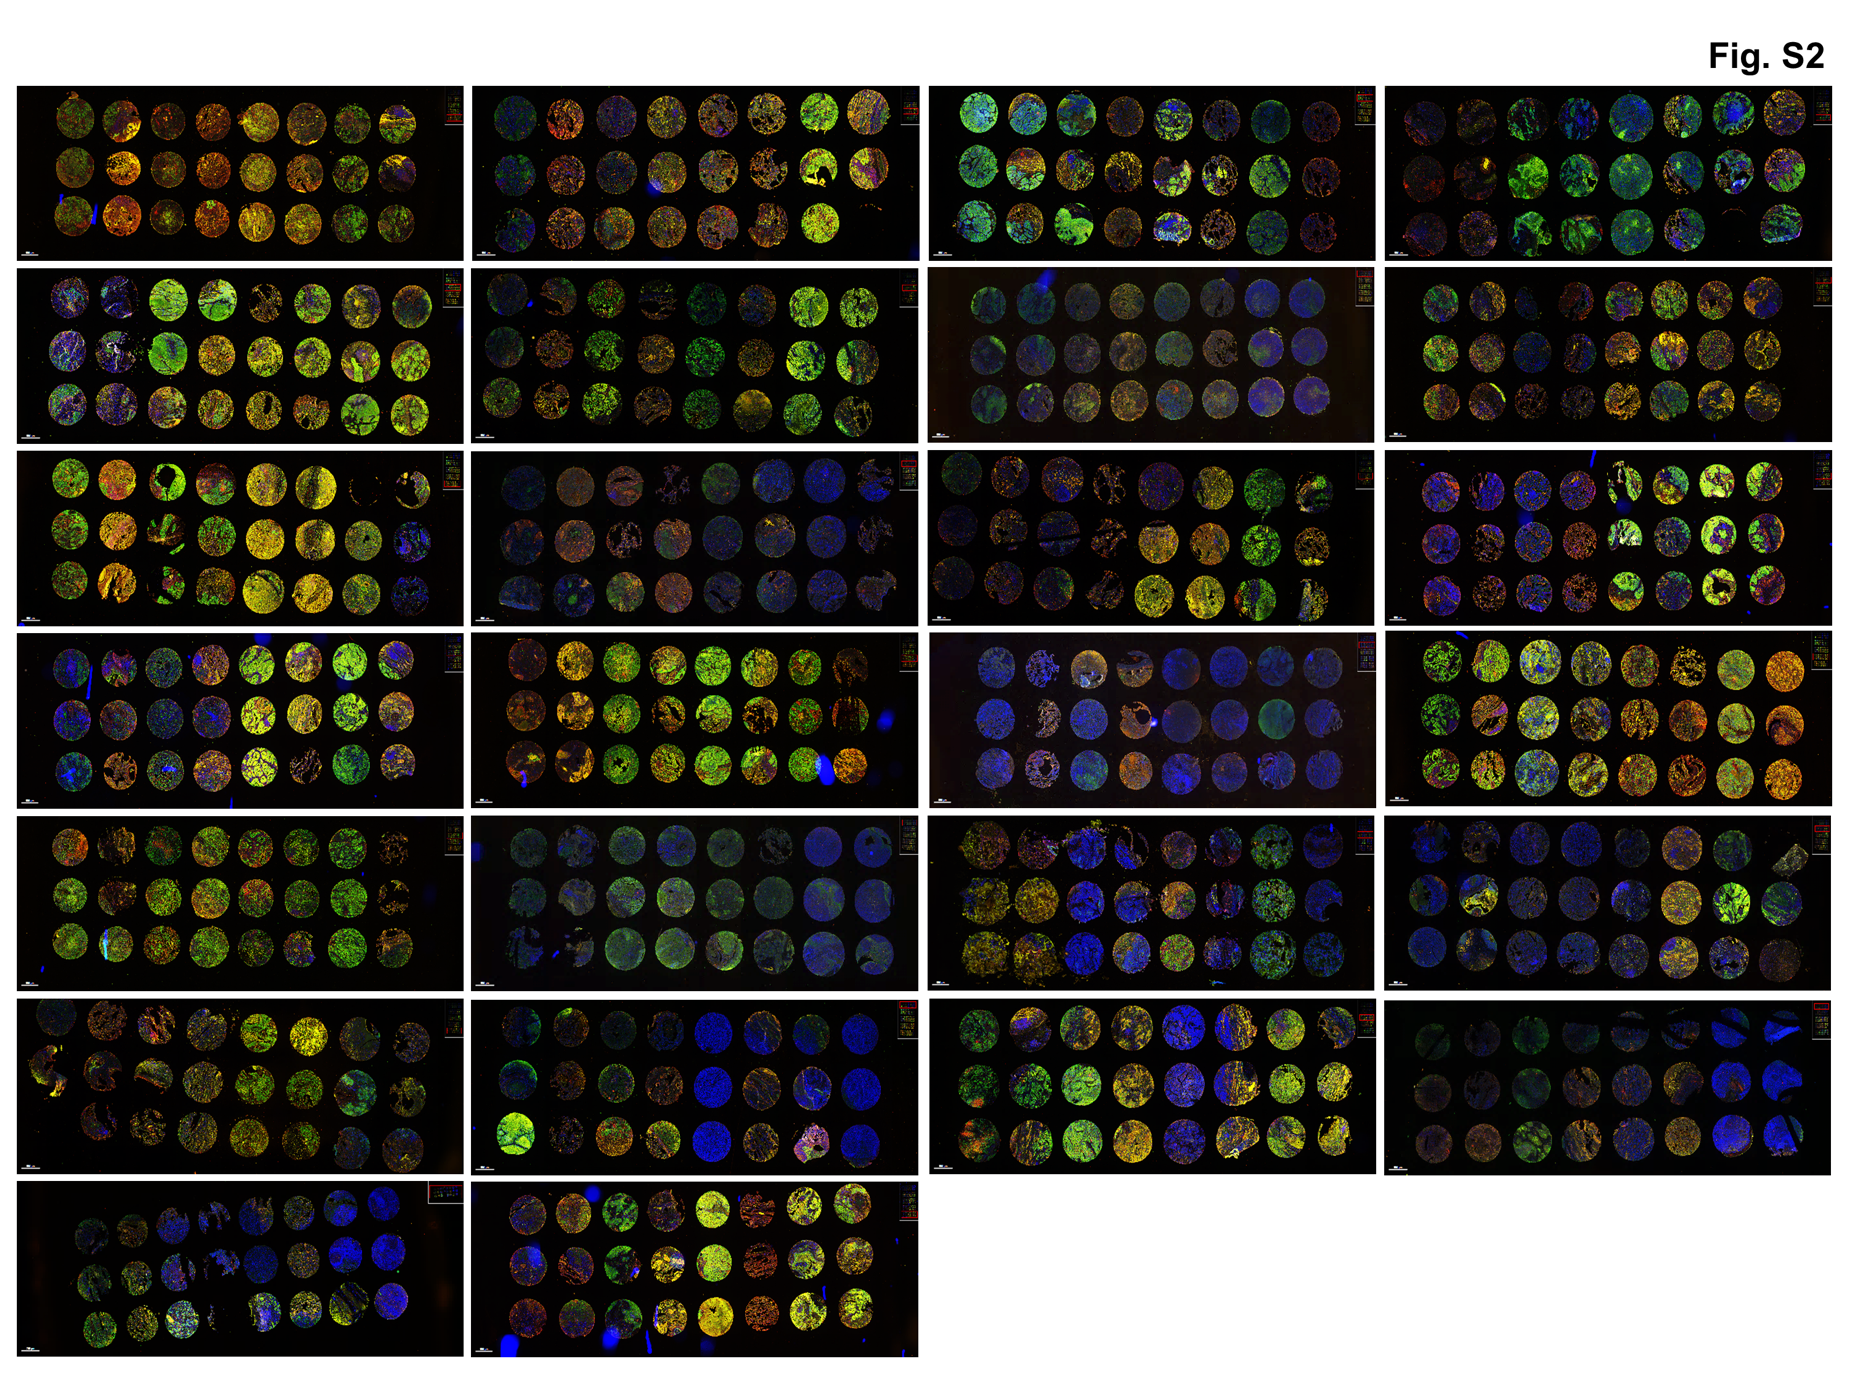


**Fig. S2.** **Multiplex staining of TMAs used in this study.** Displayed images are from raw, whole-slide scans.


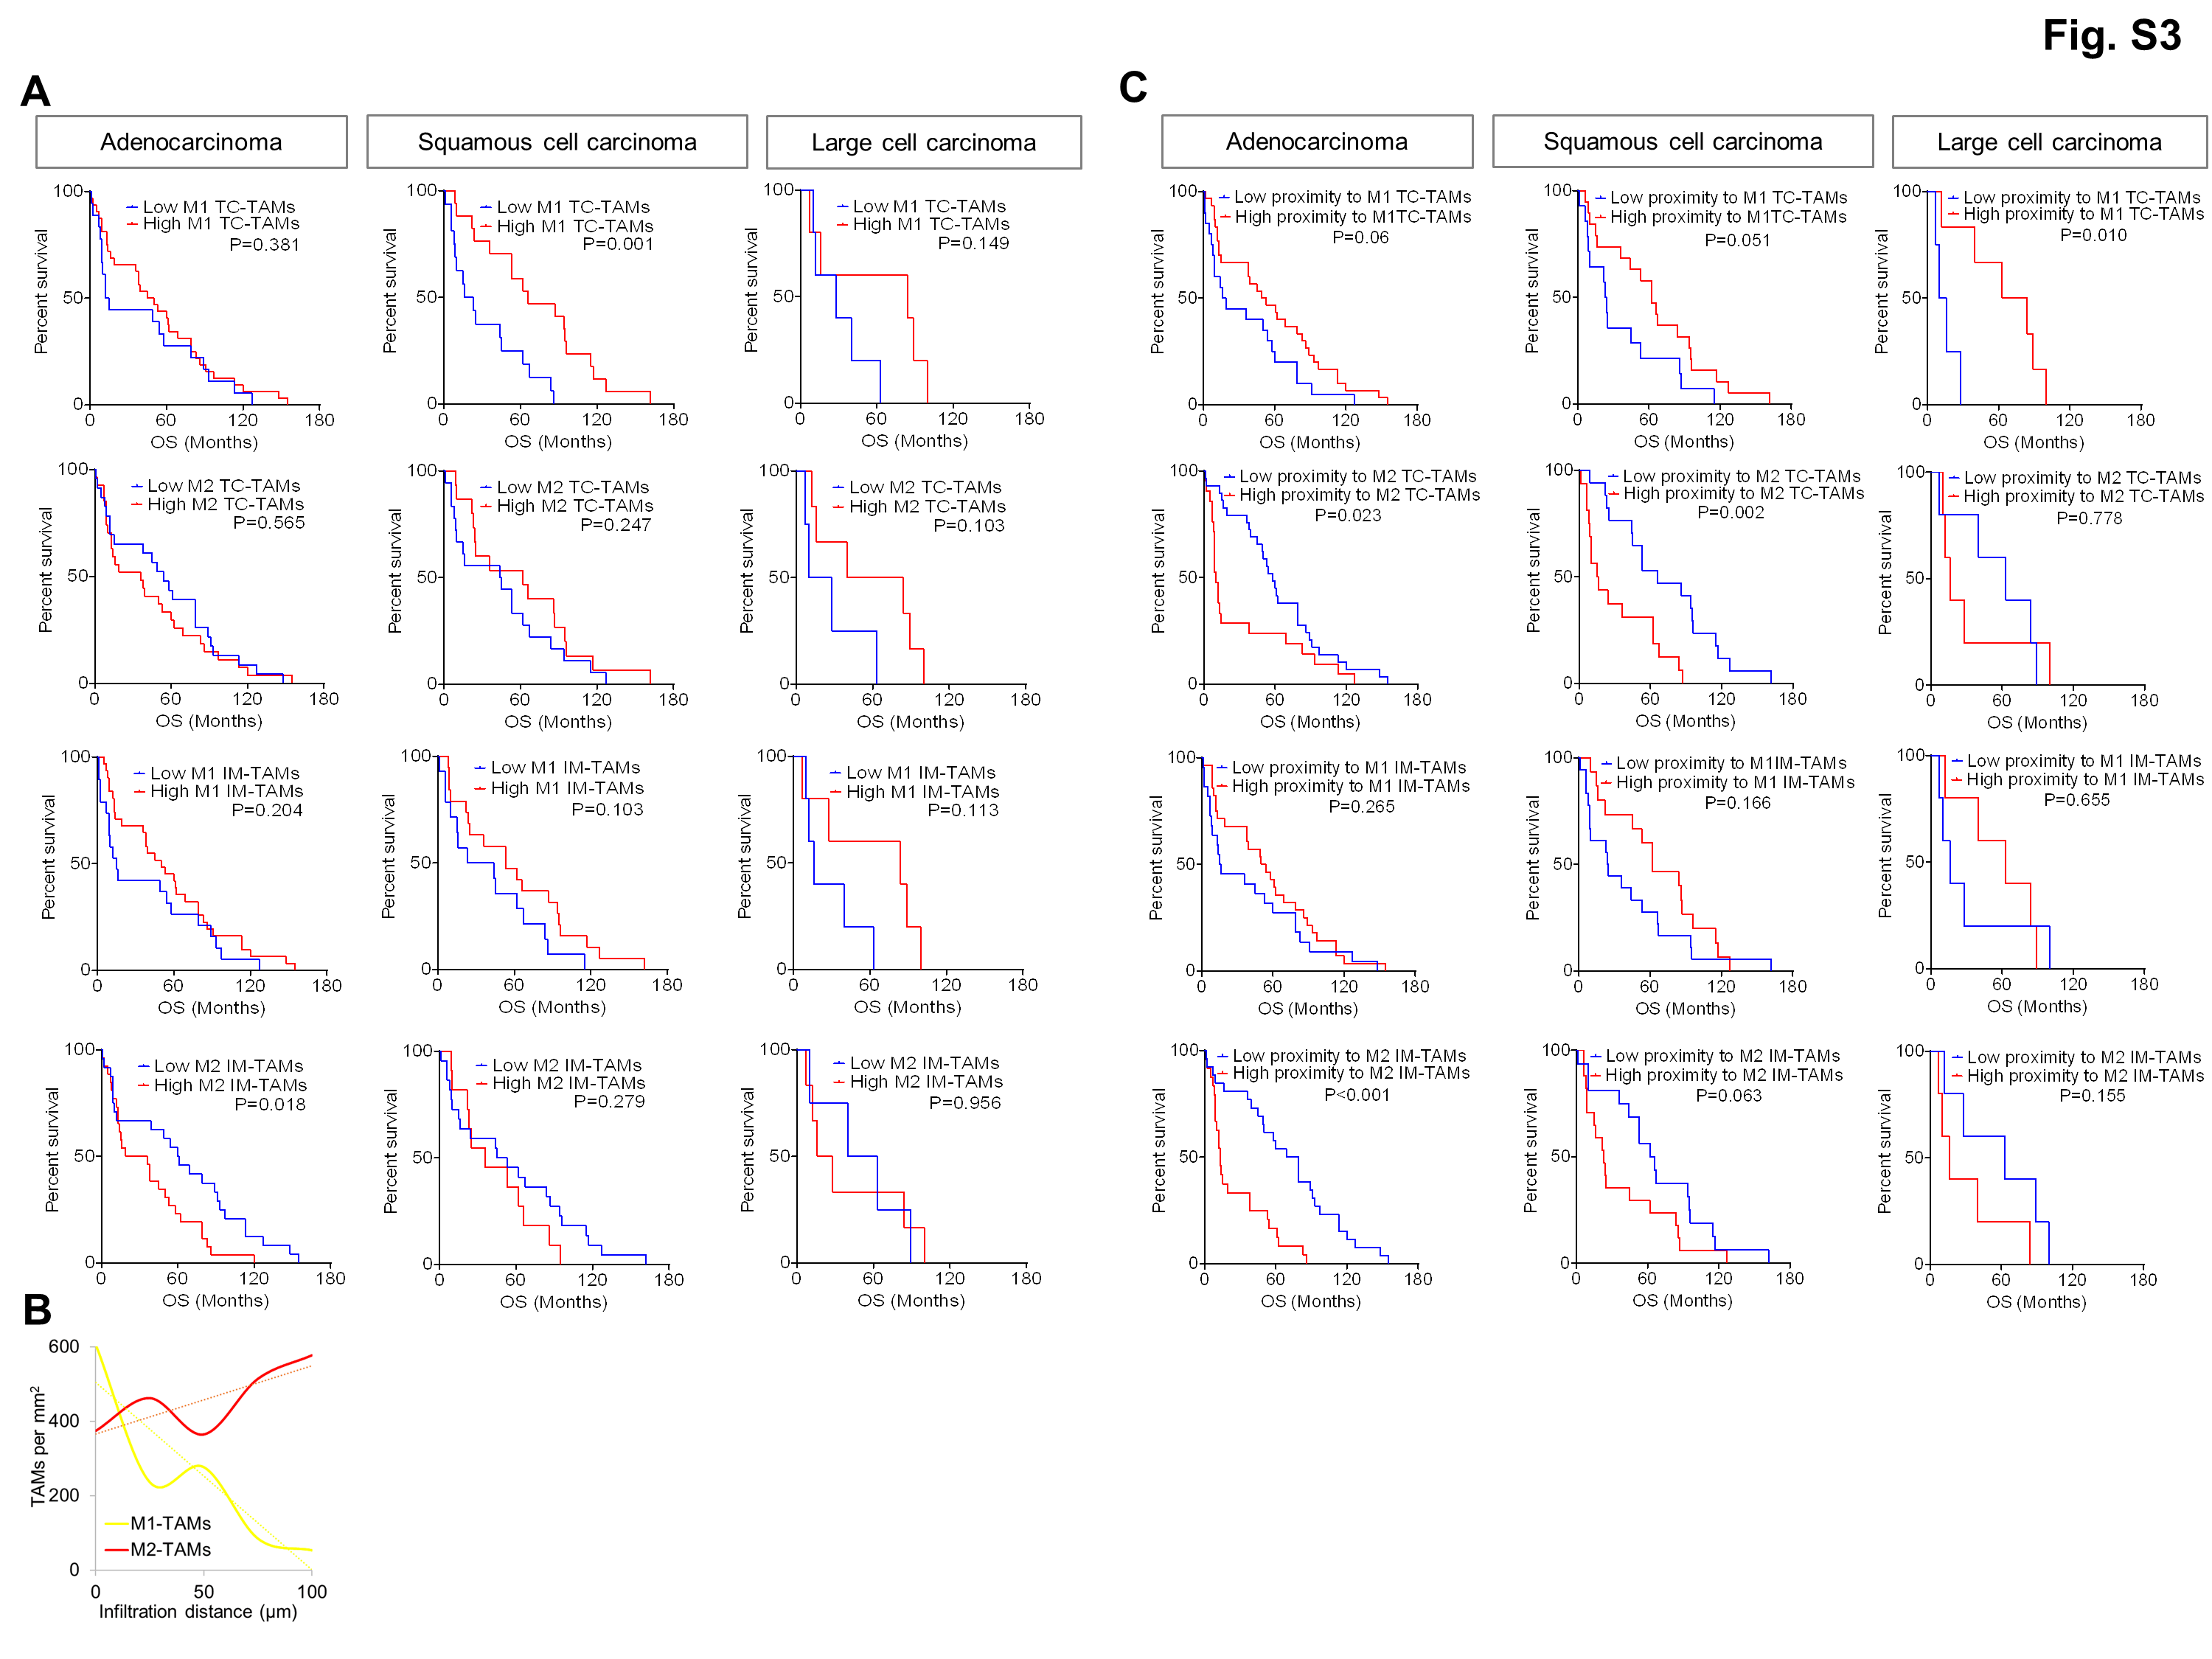


**Fig. S3.** **Kaplan-Meier survival analyses of the TAM density/ spatial distribution-related parameters in different lung cancer types.** (A) Correlation between the TAM density, at either TC or IM, and the overall survival of patients with adenocarcinoma (n = 41), squamous cell carcinoma (n = 26), and large-cell carcinoma (n = 9). *P*-values reflect comparisons of two groups by univariate analysis, using the log-rank test. (B) Infiltration distance curve for evaluating TAM densities in the parenchyma of the segmented tissues shown in Fig. 3B.(C)The correlation between TAM spatial proximity, at either TC or IM, and the overall survival of patients with adenocarcinoma (n = 41), squamous cell carcinoma (n = 26), and large-cell carcinoma (n = 9). Significance was determined using the log-rank test.


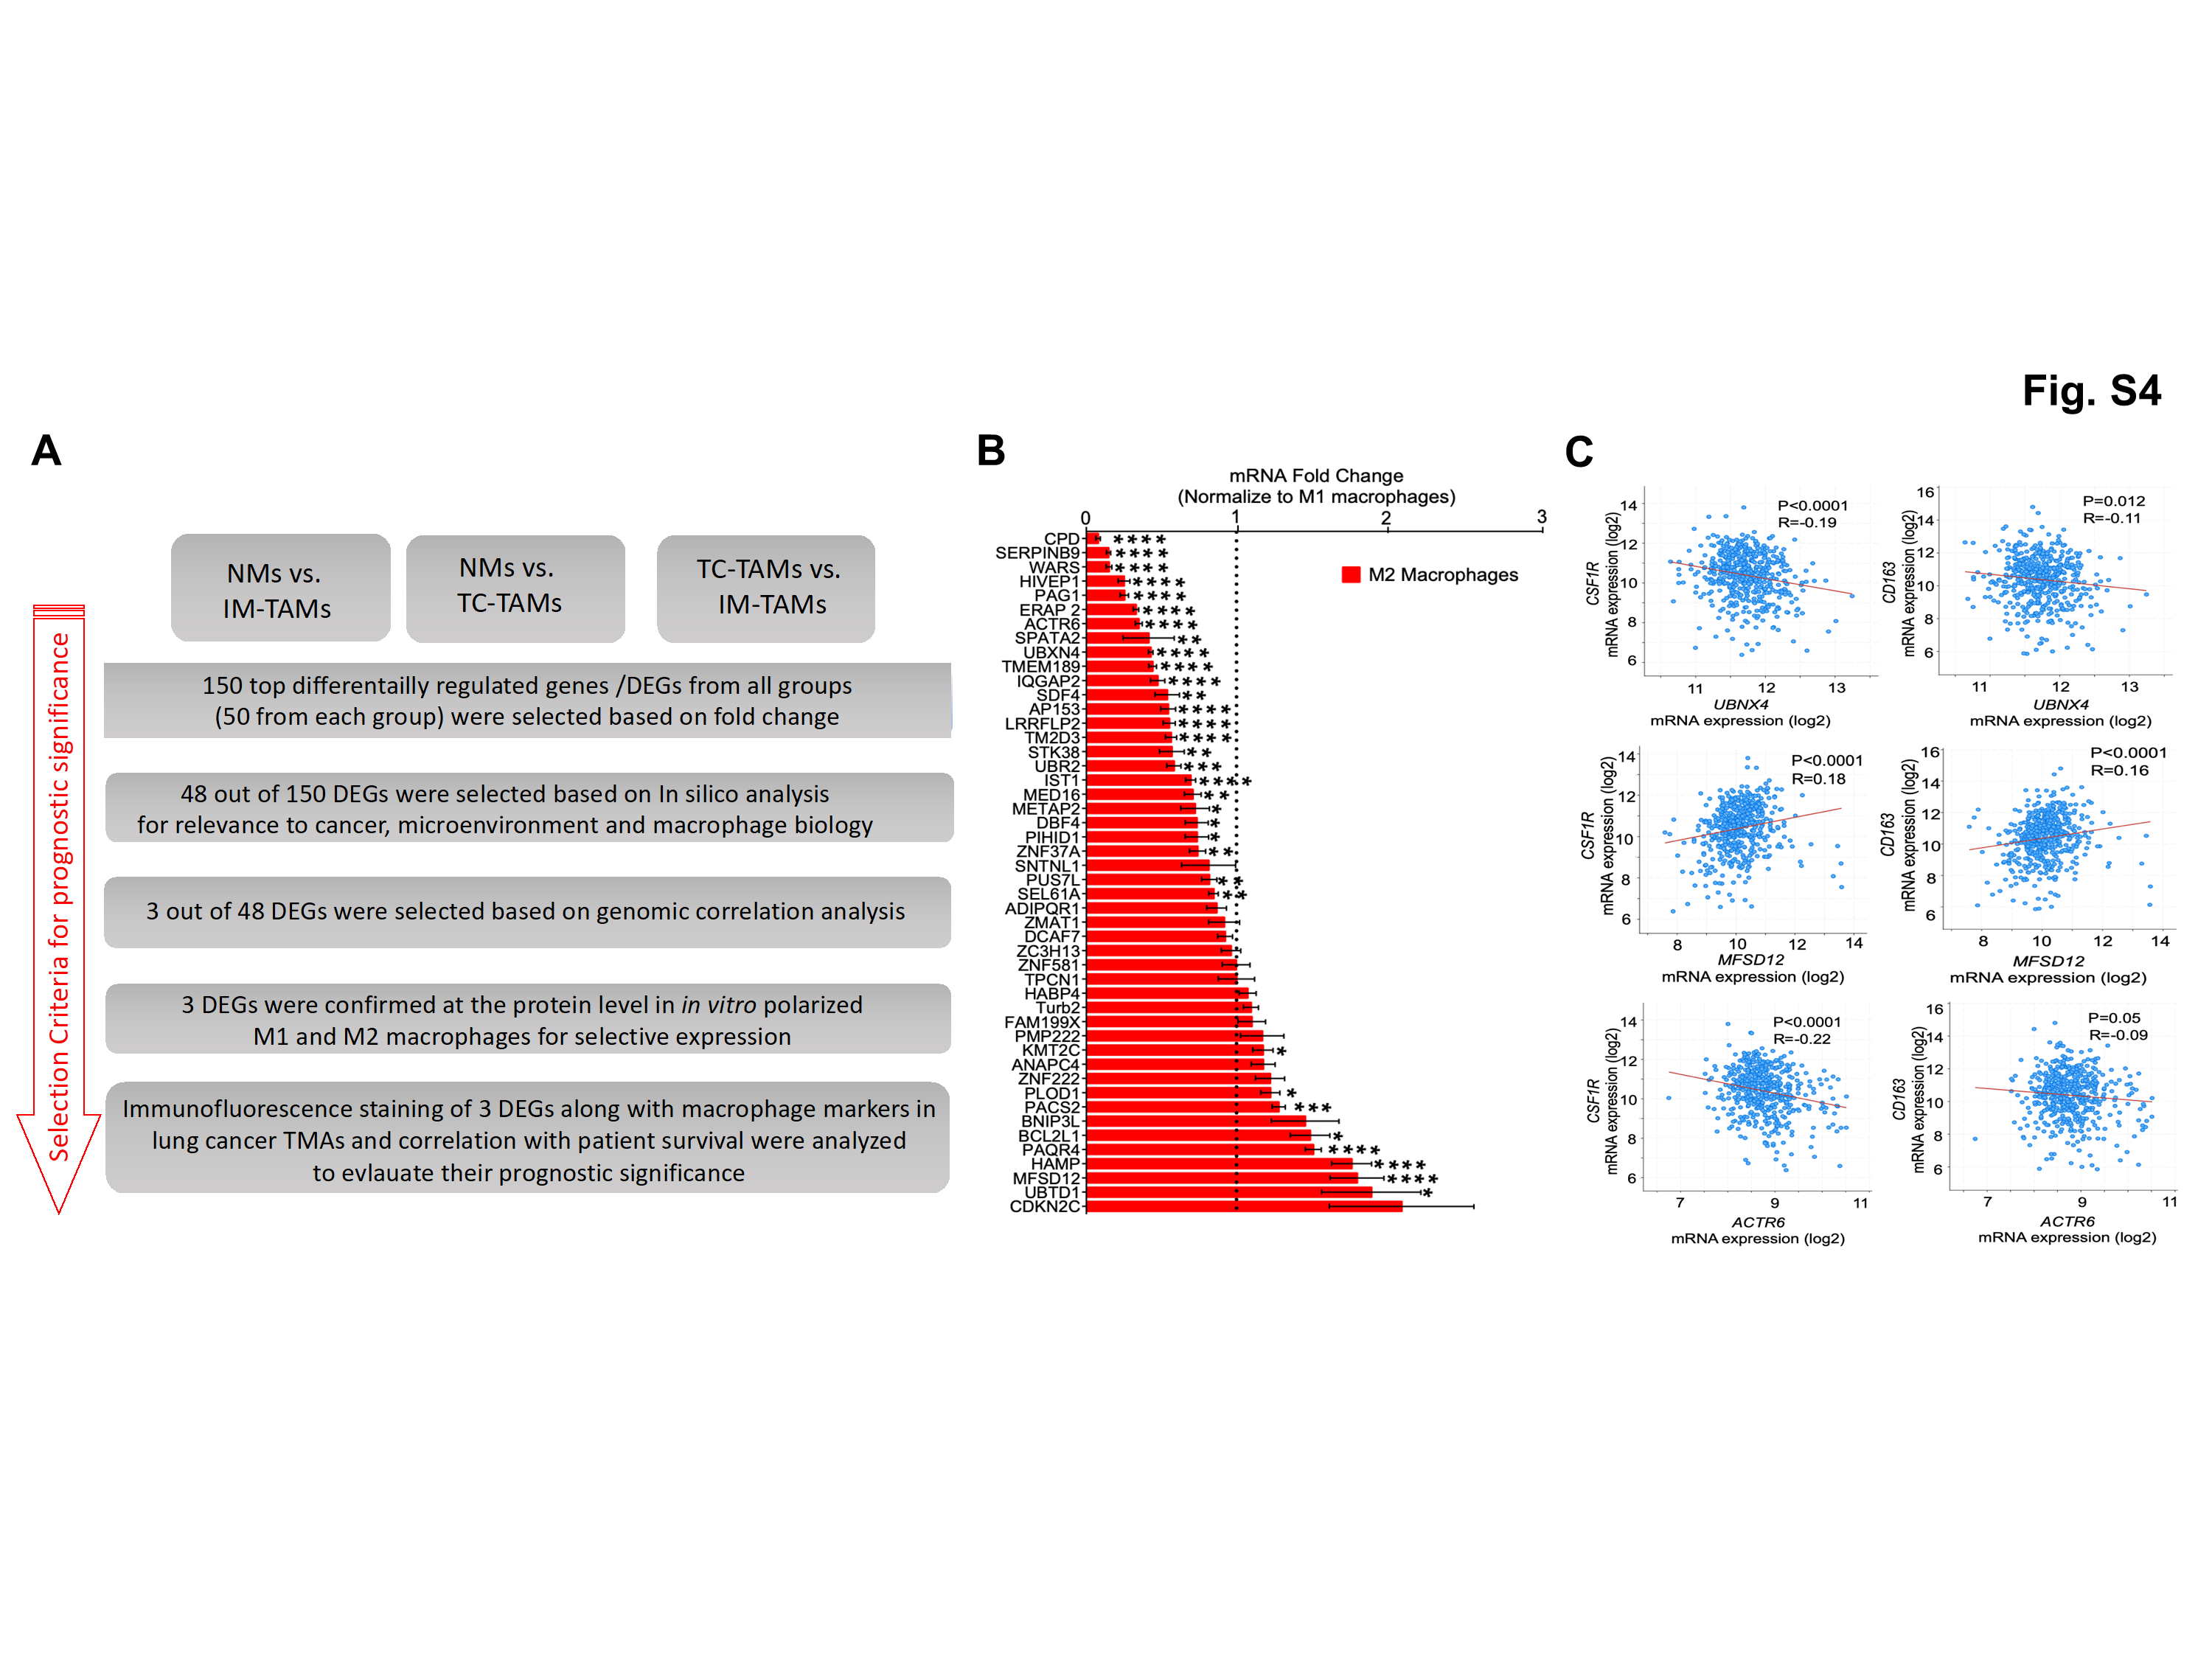


**Fig. S4. Selection criteria and expression of the top significantly differentially expressed genes in M1/M2 macrophages.** (A) Flow chart shows selection criteria of targets from RNA-seq for prognostic significance. (B) qRT-PCR detection of the top 48 differentially expressed genes among NMs, TC- and IM-TAMs in PBMC-derived M1/M2 macrophages. Significance was determined with an unpaired Student’s *t-test*, and data are presented as the mean  SEM. *P < 0.05, ** P < 0.01; *** P < 0.001, n = 4. (C) The genomic correlation was performed using cBioPortal for Cancer Genomics. Normalized mRNA expression levels of the *CSF1R* or *CD163* genes from the Illumina HiSeq_RNASeqV2 of Lung Adenocarcinoma (TCGA, PanCancer Atlas), which includes 566 patient samples. Significance was determined using Pearson’s correlation coefficient analysis.


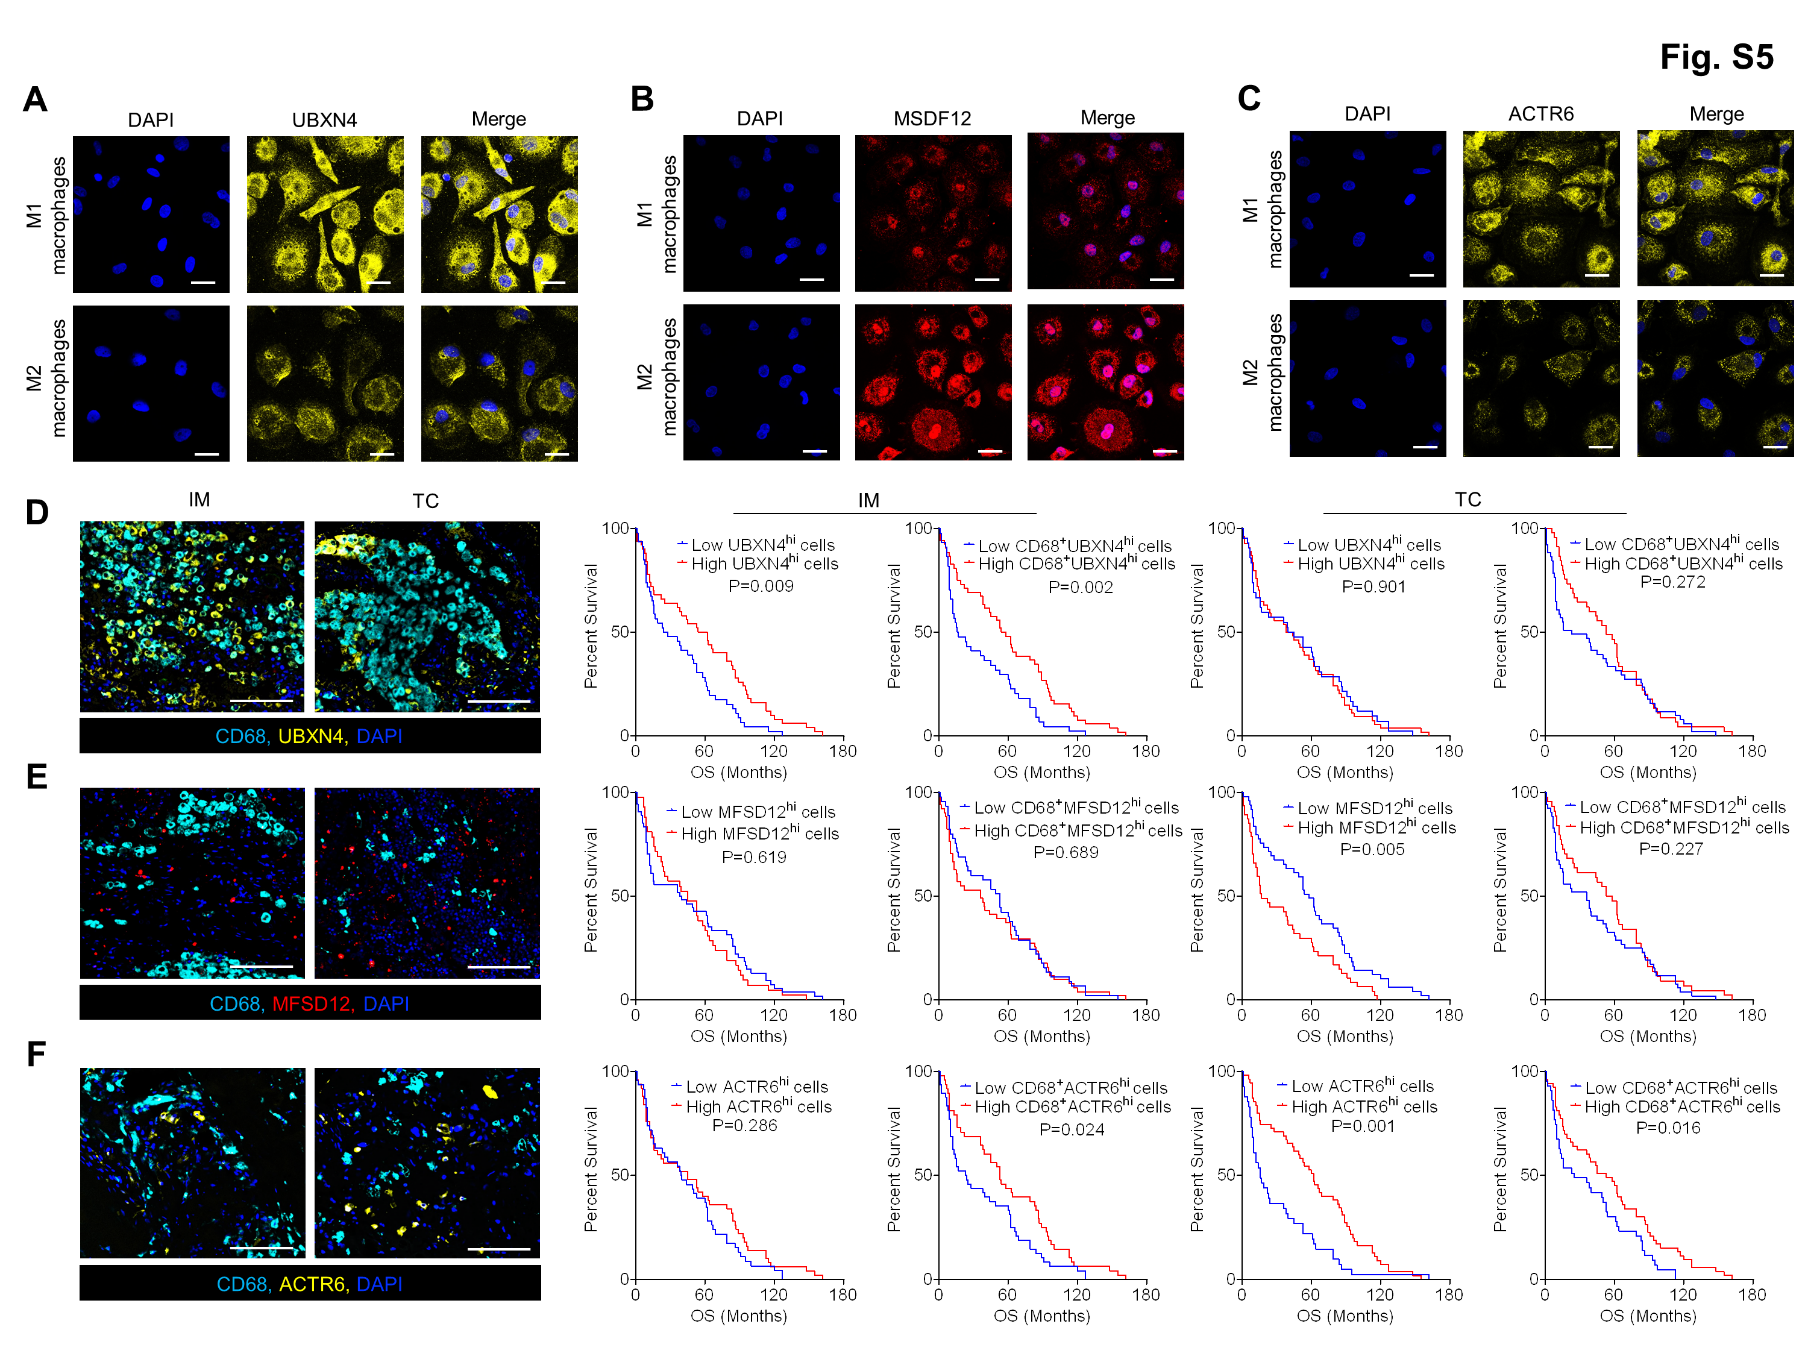


**Fig. S5. Kaplan-Meier survival analyses of UBXN4, MFSD12, and ACTR6 expression-related parameters in lung cancer patients.** (A-C) Fluorescence microscopy of in peripheral blood monocyte-derived macrophages. The expression of UBXN4 (yellow) (A), MFSD12 (Red) (B), and ACTR6 (yellow) (C) in M1/M2 macrophages were determined by fluorescence immunocytochemistry. Cell nuclei were stained with DAPI (blue). Scale bar, 20 µm. (D-F) representative composite images of the TMA showing the expression of UBXN4 (yellow) (D), MFSD12 (Red) (E), and ACTR6 (yellow) (F). CD68 is illustrated in cyan, and nuclei were stained with DAPI (blue). Scale bar, 100 µm. Survival curves are illustrated according to the expression status of UBXN4 (D), MFSD12 (E) and ACTR6 (F) either in all cell populations or only in CD68+ cells (low density vs. high density), at IM (middle panel of each subfigure) or TC (right panel of each subfigure) of lung cancer specimens. P-values reflect comparisons between two groups by univariate analysis, using the log-rank test, n = 104.
